# Supplementary material
Source: Springer Nature journal article supplement (https://www.springermedizin.de/resource/supplementary/12985_2014_2401_MOESM6_ESM.pdf/9607034)

Plasma membrane

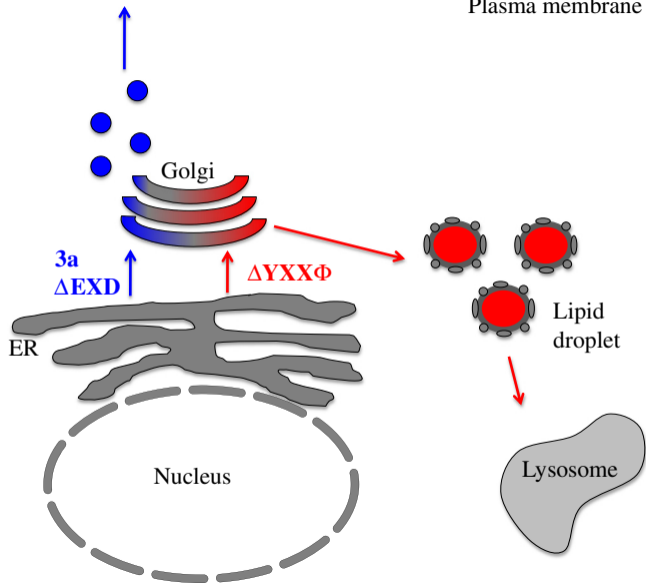

Supplement: MOESM6 [file 9607034]
